# Supplementary material for: Hydrogen Isotopes as a Sentinel of Biological Invasion by the Japanese Beetle, Popillia japonica (Newman)
Source: PLoS One. 2016 Mar 9;11(3):e0149599. doi: 10.1371/journal.pone.0149599 (PMC4784742; doi:10.1371/journal.pone.0149599)
Supplement: S5 Dataset — See readme file for more information. Excel workbook with 7 worksheets. (XLSX) [file pone.0149599.s005.xlsx]

## Sheet: Read-me
In each worksheet, variables highlighted in gray = data that were read-into OpenBUGS to implement the model(s)
Variables highlighted in yellow indicate other important quantities (such as node/parameter indices)

## Sheet: PDX beetle data
orginal order	order by year	Observation ID	Body Part	Year	YrID	date of collection	doc	Latitude	Longitude	dbeetle	Location	SQE
11	1	1	Whole	2007	1	2007-10-16	289	45.5886	-122.597	-114.39	Colwood Golf Course	8.469
12	2	2	Whole	2007	1	2007-07-19	200	45.5886	-122.597	-113.99	Courier	7.89522
13	3	3	Whole	2007	1	2007-07-18	199	45.5886	-122.597	-112.618	Air Trans	20.9914
15	4	4	Whole	2007	1	2007-08-07	219	45.5886	-122.597	-109.059	Air Trans	31.8187
19	5	5	Whole	2007	1	2007-07-23	204	45.5886	-122.597	-99.8537	Air Trans	93.0511
20	6	6	Whole	2007	1	2007-07-19	200	45.5886	-122.597	-98.7812	Courier	117.047
3	7	7	Whole	2008	2	2008-08-06	219	45.5886	-122.597	-138.508	ANG	156.456
4	8	8	Whole	2008	2	2008-08-19	232	45.5886	-122.597	-136.527	Colwood Golf Course	123.805
5	9	9	Whole	2008	2	2008-07-15	197	45.5886	-122.597	-130.324	Colwood Golf Course	47.9469
6	10	10	Whole	2008	2	2008-08-19	232	45.5886	-122.597	-127.412	Colwood Golf Course	20.3546
7	11	11	Whole	2008	2	2008-08-19	232	45.5886	-122.597	-126.49	Colwood Golf Course	15.9241
8	12	12	Whole	2008	2	2008-08-06	219	45.5886	-122.597	-126.447	ANG	19.7731
9	13	13	Whole	2008	2	2008-07-17	199	45.5886	-122.597	-122.268	ANG	2.78365
10	14	14	Whole	2008	2	2008-07-15	197	45.5886	-122.597	-117.012	Colwood Golf Course	4.36126
14	15	15	Whole	2008	2	2008-07-16	198	45.5886	-122.597	-109.106	Courier	32.4221
17	16	16	Whole	2008	2	2008-07-16	198	45.5886	-122.597	-102.952	Courier	76.5251
16	17	17	Whole	2009	3	2009-08-12	224	45.5886	-122.597	-107.77	Air Trans	41.3406
23	18	18	Whole	2009	3	2009-08-11	223	45.5886	-122.597	-97.1007	Air Trans	134.543
2	19	19	Whole	2010	3	2010-08-19	231	45.5886	-122.597	-144.697	Air Trans	275.447
21	20	20	Whole	2011	4	2011-09-08	251	45.5886	-122.597	-98	Argyle	116.64
22	21	21	Whole	2011	4	2011-08-22	234	45.5886	-122.597	-97.4432	Air Trans	126.715
24	22	22	Whole	2011	4	2011-08-16	228	45.5886	-122.597	-95.4	Air Trans	139.24
25	23	23	Whole	2011	4	2011-09-12	255	45.5886	-122.597	-95.2	Airport Way	144
26	24	24	Whole	2011	4	2011-08-22	234	45.5886	-122.597	-94.5935	Air Trans	151.45
27	25	25	Whole	2011	4	2011-08-22	234	45.5886	-122.597	-94.5067	ANG	143.84
28	26	26	Whole	2011	4	2011-08-04	216	45.5886	-122.597	-94.4467	Courier	140.501
30	27	27	Whole	2011	4	2011-08-16	228	45.5886	-122.597	-93.1103	Courier	179.284
35	28	28	Whole	2011	4	2011-08-23	235	45.5886	-122.597	-87.9186	Courier	255.406
40	29	29	Whole	2011	4	2011-09-20	263	45.5886	-122.597	-82.9397	Colwood Golf Course	337.101
42	30	30	Whole	2011	4	2011-08-23	235	45.5886	-122.597	-82.5604	Courier	332.683
44	31	31	Whole	2011	4	2011-09-20	263	45.5886	-122.597	-81.0592	Colwood Golf Course	358.756
45	32	32	Whole	2011	4	2011-09-14	257	45.5886	-122.597	-80.9	Air Trans	388.09
50	33	33	Whole	2011	4	2011-08-18	230	45.5886	-122.597	-78.5332	ANG	401.875
57	34	34	Whole	2011	4	2011-09-26	269	45.5886	-122.597	-75.3	Air Trans	495.508
31	35	35	Whole	2012	5	2012-08-23	236	45.5886	-122.597	-90.4716	ANG	213.991
38	36	36	Whole	2012	5	2012-07-23	205	45.5886	-122.597	-85.0438	Airport Way	304.72
39	37	37	Whole	2012	5	2012-08-27	240	45.5886	-122.597	-84.6162	Colwood Golf Course	298.728
41	38	38	Whole	2012	5	2012-08-15	228	45.5886	-122.597	-82.8188	Airport Way	341.555
48	39	39	Whole	2012	5	2012-09-25	269	45.5886	-122.597	-79.5293	Courier	413.337
52	40	40	Whole	2012	5	2012-08-27	240	45.5886	-122.597	-76.8398	Colwood Golf Course	451.996
53	41	41	Whole	2012	5	2012-08-09	222	45.5886	-122.597	-76.4828	ANG	471.635
56	42	42	Whole	2012	5	2012-07-31	213	45.5886	-122.597	-75.5309	Air Trans	484.401
59	43	43	Whole	2012	5	2012-09-25	269	45.5886	-122.597	-74.2886	Airport Way	522.185
60	44	44	Whole	2012	5	2012-10-04	278	45.5886	-122.597	-73.5214	Argyle	547.965
64	45	45	Whole	2012	5	2012-10-04	278	45.5886	-122.597	-71.6071	Argyle	608.257
68	46	46	Whole	2012	5	2012-08-15	228	45.5886	-122.597	-69.5121	Airport Way	656.274
71	47	47	Whole	2012	5	2012-09-13	257	45.5886	-122.597	-68.6472	Air Trans	696.055
75	48	48	Whole	2012	5	2012-06-19	171	45.5886	-122.597	-67.9306	Air Trans	729.51
76	49	49	Whole	2012	5	2012-07-31	213	45.5886	-122.597	-67.6382	Air Trans	741.574
78	50	50	Whole	2012	5	2012-06-19	171	45.5886	-122.597	-66.9027	Courier	781.609
79	51	51	Whole	2012	5	2012-08-21	234	45.5886	-122.597	-65.2467	Airport Way	817.007
80	52	52	Whole	2012	5	2012-09-13	257	45.5886	-122.597	-64.8415	Airport Way	861.92
83	53	53	Whole	2012	5	2012-10-03	277	45.5886	-122.597	-63.9371	Argyle	849.308
84	54	54	Whole	2012	5	2012-08-08	221	45.5886	-122.597	-63.8781	ANG	898.916
85	55	55	Whole	2012	5	2012-08-20	233	45.5886	-122.597	-63.6215	Courier	844.979
89	56	56	Whole	2012	5	2012-09-25	269	45.5886	-122.597	-61.167	Airport Way	1003.18
90	57	57	Whole	2012	5	2012-08-07	220	45.5886	-122.597	-59.7768	Airport Way	1017.82
91	58	58	Whole	2012	5	2012-06-19	171	45.5886	-122.597	-58.7948	Air Trans	1065.05
92	59	59	Whole	2012	5	2012-10-04	278	45.5886	-122.597	-58.3118	Argyle	1115.44
94	60	60	Whole	2012	5	2012-09-19	263	45.5886	-122.597	-56.9514	Airport Way	1163.4
95	61	61	Whole	2012	5	2012-08-06	219	45.5886	-122.597	-56.8838	Colwood Golf Course	1184.47
96	62	62	Whole	2012	5	2012-07-31	213	45.5886	-122.597	-55.9536	Courier	1236.67
97	63	63	Whole	2012	5	2012-09-13	257	45.5886	-122.597	-54.7696	Air Trans	1296.03
99	64	64	Whole	2012	5	2012-07-31	213	45.5886	-122.597	-47.8842	Courier	1663.48
101	65	65	Whole	2012	5	2012-10-04	278	45.5886	-122.597	-34.9873	Argyle	2617.62
1	66	66	Whole	2013	6	2013-08-14	226	45.5886	-122.597	-147.114	ANG	350.223
29	67	67	Whole	2013	6	2012-06-22	174	45.5886	-122.597	-93.7287	Airport Way	168.254
46	68	68	Whole	2013	6	2013-07-15	196	45.5886	-122.597	-80.5999	Airport Way	369.03
47	69	69	Whole	2013	6	2013-08-07	219	45.5886	-122.597	-79.67	ANG	412.901
55	70	70	Whole	2013	6	2013-07-24	205	45.5886	-122.597	-75.5878	Courier	477.083
58	71	71	Whole	2013	6	2013-08-16	228	45.5886	-122.597	-75.0869	Airport Way	498.321
61	72	72	Whole	2013	6	2013-08-05	217	45.5886	-122.597	-72.9532	Airport Way	595.202
63	73	73	Whole	2013	6	2013-07-24	205	45.5886	-122.597	-71.9584	Courier	576.555
65	74	74	Whole	2013	6	2013-07-24	205	45.5886	-122.597	-70.5286	ANG	615.604
66	75	75	Whole	2013	6	2013-08-12	224	45.5886	-122.597	-69.9818	Courier	638.986
67	76	76	Whole	2013	6	2013-07-22	203	45.5886	-122.597	-69.8601	Argyle	665.118
69	77	77	Whole	2013	6	2013-07-30	211	45.5886	-122.597	-69.3363	Argyle	684.016
70	78	78	Whole	2013	6	2013-10-03	276	45.5886	-122.597	-68.6835	Argyle	698.889
72	79	79	Whole	2013	6	2013-07-17	198	45.5886	-122.597	-68.5652	Airport Way	705.691
73	80	80	Whole	2013	6	2013-09-11	254	45.5886	-122.597	-68.4692	Airport Way	702.291
74	81	81	Whole	2013	6	2013-07-30	211	45.5886	-122.597	-68.4038	Argyle	665.96
77	82	82	Whole	2013	6	2013-08-16	228	45.5886	-122.597	-66.963	Airport Way	744.035
81	83	83	Whole	2013	6	2013-08-16	228	45.5886	-122.597	-64.6115	Airport Way	851.386
82	84	84	Whole	2013	6	2013-08-22	234	45.5886	-122.597	-64.2628	ANG	873.626
86	85	85	Whole	2013	6	2013-08-22	234	45.5886	-122.597	-62.5268	ANG	965.544
87	86	86	Whole	2013	6	2013-07-24	205	45.5886	-122.597	-62.2545	Courier	953.294
88	87	87	Whole	2013	6	2013-07-29	210	45.5886	-122.597	-62.0355	Courier	938.472
93	88	88	Whole	2013	6	2013-08-22	234	45.5886	-122.597	-57.7851	Courier	1145.48
98	89	89	Whole	2013	6	2013-09-03	246	45.5886	-122.597	-54.5207	Argyle	1334.39
100	90	90	Whole	2013	6	2013-09-03	246	45.5886	-122.597	-42.4569	Argyle	2024.38
18	91	91	Whole	2014	7	2014-07-05	186	45.5827	-122.609	-101.637	Airport business center, Summit parking lot	87.6649
32	92	92	Whole	2014	7	2014-07-05	186	45.5827	-122.606	-88.58	Airport business center	237.778
33	93	93	Whole	2014	7	2014-07-03	184	45.5836	-122.608	-88.4551	Airport business center	241.645
34	94	94	Whole	2014	7	2014-07-05	186	45.5842	-122.606	-88.2153	Airport business center	230.575				-147.114
36	95	95	Whole	2014	7	2014-07-05	186	45.585	-122.606	-86.8347	Airport business center	254.89				-34.9873
37	96	96	Whole	2014	7	2014-07-05	186	45.5842	-122.607	-86.6606	Airport business center	254.065
43	97	97	Whole	2014	7	2014-07-05	186	45.5842	-122.607	-81.5933	Airport business center	357.462
49	98	98	Whole	2014	7	2014-07-10	191	45.5787	-122.606	-78.8424	Airport business center	425.087
51	99	99	Whole	2014	7	2014-07-05	186	45.584	-122.606	-78.3919	Airport business center, NW corner of Horizon property.	399.924
54	100	100	Whole	2014	7	2014-07-14	195	45.5743	-122.595	-75.8248	military, Porland ANG base	463.766
62	101	101	Whole	2014	7	2014-07-11	192	45.5829	-122.609	-72.7572	Airport business center	554.734

## Sheet: city precip data MONTHLY
			annual std dev	1	2	3	4	5	6	7	8	9	10	11	12
Order	ST	City	sd.ppt	dppt[,1]	dppt[,2]	dppt[,3]	dppt[,4]	dppt[,5]	dppt[,6]	dppt[,7]	dppt[,8]	dppt[,9]	dppt[,10]	dppt[,11]	dppt[,12]	Code	City ID	Order		Gray cells = data for BUGS
1	SD	Sioux Falls	0.587702	-152	-137	-101	-68	-56	-54	-47	-52	-65	-76	-104	-131	1	1	1	Code
2	MN	Minneapolis	0.634751	-151	-136	-99	-65	-54	-51	-46	-50	-63	-76	-102	-130	1	2	2	1	Associated with beetle d2H data
3	NH	Manchester	1.73316	-106	-105	-76	-55	-46	-42	-38	-37	-50	-63	-68	-95	1	3	3	2	Associated with herbarium/voucher data
4	NY	Syracuse	1.18804	-110	-105	-75	-55	-46	-41	-38	-38	-51	-65	-69	-97	1	4	4	3	Portland data
5	NY	Albany	1.82953	-107	-105	-75	-54	-45	-41	-37	-37	-50	-63	-68	-96	1	5	5
6	NY	Rochester	0.483579	-101	-99	-69	-49	-41	-37	-34	-33	-47	-59	-63	-90	1	6	6
7	NY	Buffalo	1.11524	-110	-102	-71	-54	-45	-40	-37	-37	-51	-64	-68	-94	1	7	7
8	MA	Boston	0.77439	-101	-101	-72	-52	-43	-40	-35	-35	-48	-60	-65	-91	1	8	8
9	CT	Windsor Locks	1.41677	-101	-99	-69	-50	-41	-38	-34	-34	-47	-59	-64	-90	1	9	9
10	NY	Newburgh	1.1727	-102	-100	-69	-50	-42	-37	-34	-34	-47	-59	-64	-90	1	10	10
11	RI	Warwick	0.536484	-98	-97	-68	-48	-40	-37	-33	-33	-45	-57	-62	-87	1	11	11
12	NE	Omaha	0.2947	-129	-112	-78	-55	-47	-45	-38	-42	-55	-62	-85	-108	1	12	12
13	MI	Clinton (Township of)	0.18613	-108	-98	-68	-51	-44	-37	-36	-36	-48	-60	-69	-92	1	13	13
14	MI	Grand Rapids	0.656119	-112	-100	-68	-50	-44	-36	-35	-36	-48	-57	-73	-94	1	14	14
15	IA	Des Moines	0.370432	-125	-109	-75	-52	-46	-41	-36	-40	-52	-60	-83	-104	1	15	15
16	MI	Detroit	0.464682	-106	-95	-65	-49	-42	-35	-34	-35	-47	-57	-67	-90	1	16	16
17	WI	Milwaukee	0.638369	-118	-104	-71	-51	-45	-38	-36	-38	-49	-58	-78	-98	1	17	17
18	IA	Cedar Rapids	0.442309	-122	-107	-73	-51	-45	-39	-36	-39	-50	-58	-80	-101	1	18	18
19	MI	Detroit2	0.464682	-106	-95	-65	-49	-42	-35	-34	-35	-47	-57	-67	-90	1	19	19
20	IL	Rockford	0.313904	-116	-102	-68	-49	-44	-37	-34	-37	-48	-55	-76	-96	1	20	20
21	OH	Cleveland	0.552501	-101	-92	-62	-47	-41	-34	-34	-33	-46	-56	-64	-87	1	21	21
22	PA	Pittsburgh	0.574834	-101	-93	-65	-48	-42	-35	-35	-34	-47	-58	-64	-88	1	22	22
23	NJ	Newark	0.195166	-96	-93	-62	-45	-38	-34	-30	-30	-43	-54	-59	-84	1	23	23
24	PA	Harrisburg	0.854126	-96	-91	-60	-45	-38	-33	-31	-31	-44	-54	-60	-84	1	24	24
25	KS	Wichita	0.538848	-100	-85	-61	-49	-48	-48	-37	-39	-55	-57	-73	-88	1	25	25
26	OH	Toledo	0.285527	-102	-92	-62	-46	-41	-33	-33	-33	-45	-54	-66	-87	1	26	26
27	IL	Chicago	0.776116	-109	-96	-62	-45	-41	-33	-31	-34	-44	-50	-71	-90	1	27	27
28	PA	Philadelphia	0.912491	-92	-88	-57	-41	-35	-31	-28	-28	-41	-50	-56	-80	1	28	28
29	MO	Kansas City	0.232637	-108	-94	-63	-46	-42	-40	-32	-35	-49	-53	-72	-91	1	29	29
30	VA	Highland Springs	0.654753	-82	-77	-47	-33	-30	-25	-23	-23	-36	-42	-50	-71	1	30	30
31	IL	Peoria	0.456262	-107	-94	-60	-43	-39	-32	-29	-32	-43	-49	-69	-88	1	31	31
32	OH	Columbus	0.447575	-94	-85	-56	-41	-37	-29	-30	-30	-42	-49	-60	-81	1	32	32
33	VA	Dulles	0.736841	-90	-85	-54	-40	-35	-29	-28	-27	-41	-49	-56	-78	1	33	33
34	OK	Tulsa	1.052	-77	-66	-46	-38	-39	-42	-29	-30	-48	-47	-59	-72	1	34	34
35	VA	Roanoke	1.23581	-85	-80	-51	-36	-33	-26	-26	-25	-38	-44	-53	-74	1	35	35
36	IN	Indianapolis	0.372847	-97	-87	-55	-40	-36	-28	-27	-28	-40	-46	-61	-81	1	36	36
37	OK	Oklahoma City	0.580554	-75	-67	-48	-42	-43	-47	-33	-34	-53	-51	-61	-7	1	37	37
38	MD	Glen Burnie	0.546781	-89	-84	-53	-39	-34	-29	-27	-26	-40	-47	-54	-77	1	38	38
39	KY	Cincinnati	0.188984	-90	-81	-50	-36	-33	-26	-25	-26	-38	-43	-57	-76	1	39	39
40	MO	Springfield	0.76223	-90	-79	-52	-39	-37	-36	-27	-29	-44	-47	-61	-78	1	40	40
41	MO	St. Louis	0.29076	-94	-83	-50	-35	-33	-28	-23	-26	-38	-41	-59	-78	1	41	41
42	KY	Louisville	0.289161	-87	-78	-46	-32	-30	-24	-22	-23	-35	-39	-53	-73	1	42	42
43	VA	Norfolk	0.216087	-77	-74	-44	-31	-29	-24	-22	-22	-35	-40	-47	-67	1	43	43
44	NC	Greensboro	0.294101	-78	-74	-44	-31	-29	-24	-22	-21	-34	-39	-48	-67	1	44	44
45	TN	Alcoa	0.873861	-74	-69	-39	-26	-25	-20	-17	-17	-30	-33	-45	-63	1	45	45
46	NC	Raleigh	0.45237	-74	-70	-40	-28	-27	-22	-20	-20	-33	-37	-45	-64	1	46	46
47	SC	Greer	2.34063	-71	-68	-38	-25	-26	-21	-18	-18	-31	-34	-44	-61	1	47	47
48	TN	Nashville	0.498944	-76	-70	-38	-26	-25	-20	-17	-18	-31	-33	-46	-64	1	48	48
49	NC	Charlotte	0.502359	-73	-69	-39	-27	-26	-21	-19	-19	-31	-35	-44	-62	1	49	49
50	AR	Little Rock	0.490013	-63	-55	-33	-26	-28	-31	-19	-20	-37	-35	-46	-59	1	50	50
51	TN	Memphis	0.146846	-68	-61	-33	-23	-25	-24	-16	-17	-32	-31	-44	-59	1	51	51
52	AL	Huntsville	0.772012	-68	-63	-33	-22	-23	-20	-15	-16	-29	-30	-41	-58	1	52	52
53	GA	Atlanta	0.725349	-64	-60	-33	-21	-24	-20	-15	-16	-28	-30	-40	-55	1	53	53
54	SC	Columbia	0.549694	-64	-61	-32	-21	-23	-19	-16	-16	-28	-30	-39	-55	1	54	54
55	AL	Birmingham	0.498717	-60	-56	-29	-20	-23	-21	-14	-16	-29	-29	-39	-53	1	55	55
56	SC	Charleston	0.449341	-55	-53	-27	-19	-23	-21	-16	-17	-28	-28	-37	-48	1	56	56
57	TX	Houston	0.326782	-33	-33	-16	-18	-24	-34	-16	-17	-37	-29	-31	-41	1	57	57
59	ID	Boise	2.26897	-119	-116	-107	-90	-80	-77	-72	-78	-77	-82	-107	-113	2	58	59
60	OR	Cave Junction, OR	2.19673	-93	-98	-96	-84	-77	-74	-70	-76	-72	-73	-91	-90	2	59	60
61	CO	Delta, CO	5.93151	-128	-119	-102	-90	-88	-74	-71	-70	-82	-85	-109	-119	2	60	61
62	CO	Denver, CO	1.61348	-148	-132	-112	-93	-85	-77	-72	-72	-84	-93	-115	-131	2	61	62
63	IA	DesMoines, IA	0.370432	-125	-109	-75	-52	-46	-41	-36	-40	-52	-60	-83	-104	2	62	63
64	CO	Englewood, CO	1.94842	-148	-132	-112	-93	-86	-77	-72	-72	-85	-93	-115	-131	2	63	64
65	KY	Louisville, KY	0.289161	-87	-78	-46	-32	-30	-24	-22	-23	-35	-39	-53	-73	2	64	65
66	VA	Madison, VA	2.22425	-88	-83	-53	-38	-34	-28	-27	-27	-40	-47	-55	-77	2	65	66
67	UT	Orem, UT	5.29498	-131	-123	-111	-96	-92	-78	-76	-77	-86	-89	-114	-122	2	66	67
68	ID	Pocatello	2.25414	-143	-133	-120	-99	-87	-80	-76	-80	-85	-93	-119	-131	2	67	68
69	ID	Post Falls	2.34943	-129	-126	-114	-96	-80	-81	-77	-83	-78	-89	-115	-125	2	68	69
70	IL	Rockford, IL	0.313904	-116	-102	-68	-49	-44	-37	-34	-37	-48	-55	-76	-96	2	69	70
71	UT	Salt Lake, UT	5.4648	-131	-122	-110	-94	-89	-77	-74	-76	-84	-88	-113	-121	2	70	71
72	OH	Willmington, OH	0.373989	-93	-85	-56	-40	-36	-29	-29	-29	-41	-47	-60	-80	2	71	72
58	OR	oregon,multnomah		-94	-97	-95	-84	-74	-77	-73	-79	-67	-73	-92	-91	3	72	58

## Sheet: voucher data
herbarium/ voucher data		Beetle
		isotope
		value
		for all: analytical precision is 1 per mil
Site	CityID	dherb		Gray cells = data for BUGS
Post Falls	68	-158.369
Pocatello	67	-137.713
Orem, UT	66	-121.459
Orem, UT	66	-142.757
Orem, UT	66	-153.06
Orem, UT	66	-150.846
Boise	58	-135.748
Boise	58	-141.211
Boise	58	-154.547
Boise	58	-152.695
Boise	58	-133.547
Boise	58	-153.381
Boise	58	-150.696
Boise	58	-164.848
Boise	58	-135.665
Salt Lake, UT	70	-111.469
Denver, CO	61	-141.254
Denver, CO	61	-132.552
Denver, CO	61	-122.967
Denver, CO	61	-140.06
Denver, CO	61	-129.141
Denver, CO	61	-133.075
Denver, CO	61	-133.062
Denver, CO	61	-132.725
Denver, CO	61	-134.363
Denver, CO	61	-145.047
Englewood, CO	63	-126.139
Englewood, CO	63	-113.216
Delta, CO	60	-153.154
Delta, CO	60	-133.804
Delta, CO	60	-154.225
Cave Junction, OR	59	-128.047
Cave Junction, OR	59	-122.83
Cave Junction, OR	59	-121.508
Cave Junction, OR	59	-113.895
Cave Junction, OR	59	-112.331
Cave Junction, OR	59	-149.953
Cave Junction, OR	59	-134.797
Cave Junction, OR	59	-124.621
Cave Junction, OR	59	-124.482
Cave Junction, OR	59	-121.874
Cave Junction, OR	59	-140.429
Cave Junction, OR	59	-116.924
Cave Junction, OR	59	-114.396
Cave Junction, OR	59	-156.664
Cave Junction, OR	59	-131.781
Cave Junction, OR	59	-116.492
Cave Junction, OR	59	-136.226
Cave Junction, OR	59	-129.315
Cave Junction, OR	59	-131.273
DesMoines, IA	62	-98.2208
DesMoines, IA	62	-100.849
DesMoines, IA	62	-93.6605
DesMoines, IA	62	-101.908
DesMoines, IA	62	-97.8139
DesMoines, IA	62	-93.8312
DesMoines, IA	62	-91.4412
DesMoines, IA	62	-107.641
DesMoines, IA	62	-113.341
DesMoines, IA	62	-99.9048
Rockford, IL	69	-91.259
Rockford, IL	69	-109.687
Rockford, IL	69	-96.4226
Rockford, IL	69	-80.5133
Rockford, IL	69	-98.0206
Rockford, IL	69	-106.648
Rockford, IL	69	-97.5598
Rockford, IL	69	-104.486
Rockford, IL	69	-97.8794
Rockford, IL	69	-86.1223
Willmington, OH	71	-79.9986
Willmington, OH	71	-80.0936
Willmington, OH	71	-86.1351
Willmington, OH	71	-73.8069
Willmington, OH	71	-91.0382
Willmington, OH	71	-67.4111
Willmington, OH	71	-84.7733
Willmington, OH	71	-83.7991
Willmington, OH	71	-66.0056
Willmington, OH	71	-63.151
Madison, VA	65	-82.9056
Madison, VA	65	-92.2247
Madison, VA	65	-77.7469
Madison, VA	65	-84.0331
Madison, VA	65	-72.0708
Madison, VA	65	-95.7358
Madison, VA	65	-93.5702
Madison, VA	65	-113.394
Madison, VA	65	-84.8413
Madison, VA	65	-90.1243
Louisville, KY	64	-97.9988
Louisville, KY	64	-82.4617
Louisville, KY	64	-92.513
Louisville, KY	64	-90.8739
Louisville, KY	64	-78.8961
Louisville, KY	64	-84.6668
Louisville, KY	64	-79.498
Louisville, KY	64	-83.7889
Louisville, KY	64	-88.235
Louisville, KY	64	-91.3193

## Sheet: airline data
				pcity = relative airline density/travel
Order	City ID	ST	City	pcity		Gray cells = data for BUGS
1	1	SD	Sioux Falls	0.00454493
2	2	MN	Minneapolis	0.00985063
3	3	NH	Manchester	0.00689923
4	4	NY	Syracuse	0.00437548
5	5	NY	Albany	0.00216491
6	6	NY	Rochester	0.00395984
7	7	NY	Buffalo	0.00391689
8	8	MA	Boston	0.0116527
9	9	CT	Windsor Locks	0.0104045
10	10	NY	Newburgh	0.00187646
11	11	RI	Warwick	0.00143077
12	12	NE	Omaha	0.00544147
13	13	MI	Clinton (Township of)	0.00174013
14	14	MI	Grand Rapids	0.0032684
15	15	IA	Des Moines	0.0056011
16	16	MI	Detroit	0.0021832
17	17	WI	Milwaukee	0.0065258
18	18	IA	Cedar Rapids	0.00288726
19	19	MI	Detroit2	0.00917212
20	20	IL	Rockford	0.0106575
21	21	OH	Cleveland	0.00487088
22	22	PA	Pittsburgh	0.00535132
23	23	NJ	Newark	0.0340591
24	24	PA	Harrisburg	0.00501564
25	25	KS	Wichita	0.00273627
26	26	OH	Toledo	0.00174072
27	27	IL	Chicago	0.0922896
28	28	PA	Philadelphia	0.0253334
29	29	MO	Kansas City	0.00655694
30	30	VA	Highland Springs	0.00533655
31	31	IL	Peoria	0.00269331
32	32	OH	Columbus	0.00935218
33	33	VA	Dulles	0.00642227
34	34	OK	Tulsa	0.00428809
35	35	VA	Roanoke	0.0016992
36	36	IN	Indianapolis	0.0708404
37	37	OK	Oklahoma City	0.00289
38	38	MD	Glen Burnie	0.00663831
39	39	KY	Cincinnati	0.0460185
40	40	MO	Springfield	0.00280514
41	41	MO	St. Louis	0.00574425
42	42	KY	Louisville	0.151452
43	43	VA	Norfolk	0.00282696
44	44	NC	Greensboro	0.00814257
45	45	TN	Alcoa	0.00408652
46	46	NC	Raleigh	0.00550535
47	47	SC	Greer	0.00286935
48	48	TN	Nashville	0.00398291
49	49	NC	Charlotte	0.00475208
50	50	AR	Little Rock	0.00198626
51	51	TN	Memphis	0.294329
52	52	AL	Huntsville	0.00533902
53	53	GA	Atlanta	0.0294072
54	54	SC	Columbia	0.00527085
55	55	AL	Birmingham	0.00237923
56	56	SC	Charleston	0.0035213
57	57	TX	Houston	0.0229134

## Sheet: experimental data
time	Date of harvest	Time.mix	dmix	Observation ID
original, t0	2013-07-17	0	-82.9056	1
original, t0	2013-07-17	0	-92.2247	2
original, t0	2013-07-17	0	-77.7469	3
original, t0	2013-07-17	0	-84.0331	4
original, t0	2013-07-17	0	-72.0708	5
original, t0	2013-07-17	0	-95.7358	6
original, t0	2013-07-17	0	-93.5702	7
original, t0	2013-07-17	0	-113.394	8
original, t0	2013-07-17	0	-84.8413	9
original, t0	2013-07-17	0	-90.1243	10
1 week	2013-07-24	7	-83.5	11
1 week	2013-07-24	7	-83.7	12
1 week	2013-07-24	7	-100.1	13
1 week	2013-07-24	7	-75.5	14
1 week	2013-07-24	7	-87.7	15
1 week	2013-07-24	7	-92.4	16
1 week	2013-07-24	7	-85.4	17
1 week	2013-07-24	7	-88.6	18
1 week	2013-07-24	7	-80.6	19
1 week	2013-07-24	7	-82.4	20
2 weeks	2013-07-31	14	-81.8	21
2 weeks	2013-07-31	14	-82.7	22
2 weeks	2013-07-31	14	-89.6	23
2 weeks	2013-07-31	14	-89.6	24
2 weeks	2013-07-31	14	-86.3	25
2 weeks	2013-07-31	14	-89.4	26
2 weeks	2013-07-31	14	-80.1	27
2 weeks	2013-07-31	14	-89.7	28
2 weeks	2013-07-31	14	-85.6	29
2 weeks	2013-07-31	14	-81.7	30
2 weeks	2013-07-31	14	-81.9	31
3 weeks	2013-08-07	21	-140	32
3 weeks	2013-08-07	21	-117.4	33
3 weeks	2013-08-07	21	-98.4	34
3 weeks	2013-08-07	21	-101.6	35
3 weeks	2013-08-07	21	-120.9	36
3 weeks	2013-08-07	21	-96.6	37
3 weeks	2013-08-07	21	-91.9	38
3 weeks	2013-08-07	21	-139.6	39
3 weeks	2013-08-07	21	-97.4	40
3 weeks	2013-08-07	21	-103.6	41
4 weeks	2013-08-14	28	-140	42
4 weeks	2013-08-14	28	-134	43
4 weeks	2013-08-14	28	-100.1	44
4 weeks	2013-08-14	28	-156.8	45
4 weeks	2013-08-14	28	-64.1	46
4 weeks	2013-08-14	28	-152.5	47
4 weeks	2013-08-14	28	-140	48
4 weeks	2013-08-14	28	-93.2	49
4 weeks	2013-08-14	28	-136.7	50
4 weeks	2013-08-14	28	-108.9	51
4 weeks	2013-08-14	28	-108.1	52
5 weeks	2013-08-21	35	-152.2	53
5 weeks	2013-08-21	35	-147.8	54
5 weeks	2013-08-21	35	-121.7	55
5 weeks	2013-08-21	35	-183.5	56
5 weeks	2013-08-21	35	-121	57
5 weeks	2013-08-21	35	-109.3	58
5 weeks	2013-08-21	35	-147.9	59
5 weeks	2013-08-21	35	-182.9	60
5 weeks	2013-08-21	35	-118.6	61
5 weeks	2013-08-21	35	-156.2	62

## Sheet: date year indexing
To relate date of collection (DOY) to month, and to get the first day of each month:
DOY	month			Month	first.day
1	1			1	1
2	1			2	32
3	1			3	60
4	1			4	91
5	1			5	121
6	1			6	152
7	1			7	182
8	1			8	213
9	1			9	244
10	1			10	274
11	1			11	305
12	1			12	335
13	1
14	1
15	1
16	1
17	1
18	1
19	1
20	1
21	1
22	1
23	1
24	1
25	1
26	1
27	1
28	1
29	1
30	1
31	1
32	2
33	2
34	2
35	2
36	2
37	2
38	2
39	2
40	2
41	2
42	2
43	2
44	2
45	2
46	2
47	2
48	2
49	2
50	2
51	2
52	2
53	2
54	2
55	2
56	2
57	2
58	2
59	2
60	3
61	3
62	3
63	3
64	3
65	3
66	3
67	3
68	3
69	3
70	3
71	3
72	3
73	3
74	3
75	3
76	3
77	3
78	3
79	3
80	3
81	3
82	3
83	3
84	3
85	3
86	3
87	3
88	3
89	3
90	3
91	4
92	4
93	4
94	4
95	4
96	4
97	4
98	4
99	4
100	4
101	4
102	4
103	4
104	4
105	4
106	4
107	4
108	4
109	4
110	4
111	4
112	4
113	4
114	4
115	4
116	4
117	4
118	4
119	4
120	4
121	5
122	5
123	5
124	5
125	5
126	5
127	5
128	5
129	5
130	5
131	5
132	5
133	5
134	5
135	5
136	5
137	5
138	5
139	5
140	5
141	5
142	5
143	5
144	5
145	5
146	5
147	5
148	5
149	5
150	5
151	5
152	6
153	6
154	6
155	6
156	6
157	6
158	6
159	6
160	6
161	6
162	6
163	6
164	6
165	6
166	6
167	6
168	6
169	6
170	6
171	6
172	6
173	6
174	6
175	6
176	6
177	6
178	6
179	6
180	6
181	6
182	7
183	7
184	7
185	7
186	7
187	7
188	7
189	7
190	7
191	7
192	7
193	7
194	7
195	7
196	7
197	7
198	7
199	7
200	7
201	7
202	7
203	7
204	7
205	7
206	7
207	7
208	7
209	7
210	7
211	7
212	7
213	8
214	8
215	8
216	8
217	8
218	8
219	8
220	8
221	8
222	8
223	8
224	8
225	8
226	8
227	8
228	8
229	8
230	8
231	8
232	8
233	8
234	8
235	8
236	8
237	8
238	8
239	8
240	8
241	8
242	8
243	8
244	9
245	9
246	9
247	9
248	9
249	9
250	9
251	9
252	9
253	9
254	9
255	9
256	9
257	9
258	9
259	9
260	9
261	9
262	9
263	9
264	9
265	9
266	9
267	9
268	9
269	9
270	9
271	9
272	9
273	9
274	10
275	10
276	10
277	10
278	10
279	10
280	10
281	10
282	10
283	10
284	10
285	10
286	10
287	10
288	10
289	10
290	10
291	10
292	10
293	10
294	10
295	10
296	10
297	10
298	10
299	10
300	10
301	10
302	10
303	10
304	10
305	11
306	11
307	11
308	11
309	11
310	11
311	11
312	11
313	11
314	11
315	11
316	11
317	11
318	11
319	11
320	11
321	11
322	11
323	11
324	11
325	11
326	11
327	11
328	11
329	11
330	11
331	11
332	11
333	11
334	11
335	12
336	12
337	12
338	12
339	12
340	12
341	12
342	12
343	12
344	12
345	12
346	12
347	12
348	12
349	12
350	12
351	12
352	12
353	12
354	12
355	12
356	12
357	12
358	12
359	12
360	12
361	12
362	12
363	12
364	12
365	12
